# Supplementary material for: Clearing the Air to Address Pollution’s Cardiovascular Health Crisis
Source: PubMed Central journal article supplement (PMC11523843; doi:10.5334/gh.1364), 2024-10-30
Supplement: gh-19-1-1364-s1.pdf [file gh-19-1-1364-s1.pdf]

## Appendix

### Table of contents

|                                                                                               |   |
|-----------------------------------------------------------------------------------------------|---|
| Systematic review - Association between exposure to air pollutants and increased risk of CVDs | 1 |
| Appendix Table 1: Full set of meta-analysis data, short-term effect of air pollution          | 2 |
| Appendix Table 2: Full set of meta-analysis data, long-term effect of air pollution           | 5 |

## Systematic review - Association between exposure to air pollutants and increased risk of CVDs

A systematic search was conducted in PubMed, to identify meta-analyses published between 2010 and 2024 that investigated the association between air pollution and cardiovascular outcomes. A total of 127 papers were initially identified through the search keywords including: ("Air Pollution/adverse effects"[MAJR] OR "Air Pollution/analysis"[MAJR] OR "Air Pollutants/adverse effects"[MAJR] OR "Air Pollutants/analysis"[MAJR]) AND ("Cause of Death"[Mesh] OR "Cardiovascular Diseases"[Mesh]). Following a screening process, 42 papers remained relevant for further analysis.

Data were extracted for the following outcomes: CVD mortality, heart failure, stroke mortality, and myocardial infarction risk for short-term effects, and CVD incidence, heart failure, ischemic heart disease (IHD), and stroke incidence and mortality for long-term effects. Data were grouped based on short- and long-term effects, as reported in the papers.

Effects of air pollutants, including black carbon (BC), carbon monoxide (CO), nitrogen dioxide (NO<sub>2</sub>), ozone (O<sub>3</sub>), sulphur dioxide (SO<sub>2</sub>), particulate matter with diameters of 10 micrometres or less (PM<sub>10</sub>), particulate matter with diameters of 2.5 micrometres or less (PM<sub>2.5</sub>), and nitrogen oxides (NOX), were extracted

Significant estimates were identified based on the confidence intervals. In the main paper we report a subset of the data extracted based on the following criteria: 1) we selected significant estimates for each outcome and air pollutant; 2) following step 1 we selected studies with larger samples; 3) following step 2 we selected papers with the largest geographical representation.

All data extracted are reported in Appendix Table 1 and Appendix Table 2.

Appendix Table 1: Full set of meta-analysis data, short-term effect of air pollution

| Cardiovascular condition       | Pollutant | Study size | Relative Risk | Relative Risk 95% CI | Standard error in 10- | Odds Ratio | Odds Ratio 95% CI | Percentage increase | Percentage increase 95% CI | Increase in pollutant | Study                                                                                               | Coverage |
|--------------------------------|-----------|------------|---------------|----------------------|-----------------------|------------|-------------------|---------------------|----------------------------|-----------------------|-----------------------------------------------------------------------------------------------------|----------|
| Atrial Fibrillation            | CO        | 7          | 1.02          | (0.987-1.054)        |                       |            |                   |                     |                            | 1000 ppb              | Int Heart J. 2021 Mar 30;62(2):290-297. doi: 10.1536/ihj.20-523. Epub 2021 Mar 6.                   | Global   |
| Atrial Fibrillation            | NO2       | 8          | 1.032         | (1.006-1.058)        |                       |            |                   |                     |                            | 10 ppb                | Int Heart J. 2021 Mar 30;62(2):290-297. doi: 10.1536/ihj.20-523. Epub 2021 Mar 6.                   | Global   |
| Atrial Fibrillation            | O3        | 7          | 1.005         | (0.996-1.047)        |                       |            |                   |                     |                            | 10 ppb                | Int Heart J. 2021 Mar 30;62(2):290-297. doi: 10.1536/ihj.20-523. Epub 2021 Mar 6.                   | Global   |
| Atrial Fibrillation            | PM10      | 7          | 1.011         | (0.998-1.024)        |                       |            |                   |                     |                            | 10 µg/m3              | Int Heart J. 2021 Mar 30;62(2):290-297. doi: 10.1536/ihj.20-523. Epub 2021 Mar 6.                   | Global   |
| Atrial Fibrillation            | PM2.5     | 9          | 1.018         | (1.000-1.037)        |                       |            |                   |                     |                            | 10 µg/m3              | Int Heart J. 2021 Mar 30;62(2):290-297. doi: 10.1536/ihj.20-523. Epub 2021 Mar 6.                   | Global   |
| Atrial Fibrillation            | PM2.5     | 10         |               |                      |                       | 1.11       | (1.03-1.19)       |                     |                            | 10 µg/m3              | Sci Total Environ. 2021 Aug 25;784:147106. doi: 10.1016/j.scitotenv.2021.147106. Epub 2021 Apr 15.  | Global   |
| Atrial Fibrillation            | SO2       | 8          | 1.029         | (1.003-1.057)        |                       |            |                   |                     |                            | 10 ppb                | Int Heart J. 2021 Mar 30;62(2):290-297. doi: 10.1536/ihj.20-523. Epub 2021 Mar 6.                   | Global   |
| Atrial fibrillation prevalence | CO        | 4          |               |                      |                       | 1.02       | (0.99-1.06)       |                     |                            | 1 ppm                 | Ecotoxicol Environ Saf. 2021 Jan 15;208:111508. doi: 10.1016/j.ecoenv.2020.111508. Epub 2020 Nov 1. | Global   |
| Atrial fibrillation prevalence | NO2       | 5          |               |                      |                       | 1.03       | (1.01-1.04)       |                     |                            | 10ppb                 | Ecotoxicol Environ Saf. 2021 Jan 15;208:111508. doi: 10.1016/j.ecoenv.2020.111508. Epub 2020 Nov 1. | Global   |
| Atrial fibrillation prevalence | O3        | 4          |               |                      |                       | 1.01       | (0.97-1.06)       |                     |                            | 10ppb                 | Ecotoxicol Environ Saf. 2021 Jan 15;208:111508. doi: 10.1016/j.ecoenv.2020.111508. Epub 2020 Nov 1. | Global   |
| Atrial fibrillation prevalence | PM10      | 7          |               |                      |                       | 1.03       | (1.01-1.05)       |                     |                            | 10 µg/m3              | Ecotoxicol Environ Saf. 2021 Jan 15;208:111508. doi: 10.1016/j.ecoenv.2020.111508. Epub 2020 Nov 1. | Global   |
| Atrial fibrillation prevalence | PM2.5     | 9          |               |                      |                       | 1.01       | (1.00-1.02)       |                     |                            | 10 µg/m3              | Ecotoxicol Environ Saf. 2021 Jan 15;208:111508. doi: 10.1016/j.ecoenv.2020.111508. Epub 2020 Nov 1. | Global   |
| Atrial fibrillation prevalence | SO2       | 4          |               |                      |                       | 1.05       | (1.01-1.09)       |                     |                            | 10ppb                 | Ecotoxicol Environ Saf. 2021 Jan 15;208:111508. doi: 10.1016/j.ecoenv.2020.111508. Epub 2020 Nov 1. | Global   |
| Cardiac Arrhythmia mortality   | CO        | 3          | 1.077         | (0.790-1.467)        |                       |            |                   |                     |                            | 1 ppm                 | Int J Environ Res Public Health. 2016 Jun 28;13(7):642. doi: 10.3390/ijerph13070642.                | Global   |
| Cardiac Arrhythmia mortality   | NO2       | 4          | 1.026         | (1.003-1.050)        |                       |            |                   |                     |                            | 10 ppb                | Int J Environ Res Public Health. 2016 Jun 28;13(7):642. doi: 10.3390/ijerph13070642.                | Global   |
| Cardiac Arrhythmia mortality   | O3        | 3          | 0.997         | (0.975-1.018)        |                       |            |                   |                     |                            | 10 ppb                | Int J Environ Res Public Health. 2016 Jun 28;13(7):642. doi: 10.3390/ijerph13070642.                | Global   |
| Cardiac Arrhythmia mortality   | PM10      | 2          | 1.009         | (0.994-1.024)        |                       |            |                   |                     |                            | 10 µg/m3              | Int J Environ Res Public Health. 2016 Jun 28;13(7):642. doi: 10.3390/ijerph13070642.                | Global   |
| Cardiac Arrhythmia mortality   | PM2.5     | 3          | 1.027         | (0.987-1.068)        |                       |            |                   |                     |                            | 10 µg/m3              | Int J Environ Res Public Health. 2016 Jun 28;13(7):642. doi: 10.3390/ijerph13070642.                | Global   |
| Cardiac Arrhythmia mortality   | SO2       | 3          | 1.028         | (0.988-1.069)        |                       |            |                   |                     |                            | 10 ppb                | Int J Environ Res Public Health. 2016 Jun 28;13(7):642. doi: 10.3390/ijerph13070642.                | Global   |
| Cardiac disease mortality      | NO2       | 4          | 1.0177        |                      | 23                    |            |                   |                     |                            | 10 µg/m3              | BMC Public Health. 2013 Apr 18;13:360. doi: 10.1186/1471-2458-13-360.                               | China    |
| Cardiac disease mortality      | O3        | 4          | 1.0026        |                      | 31                    |            |                   |                     |                            | 10 µg/m3              | BMC Public Health. 2013 Apr 18;13:360. doi: 10.1186/1471-2458-13-360.                               | China    |
| Cardiac disease mortality      | PM10      | 4          | 1.0062        |                      | 15                    |            |                   |                     |                            | 10 µg/m3              | BMC Public Health. 2013 Apr 18;13:360. doi: 10.1186/1471-2458-13-360.                               | China    |
| Cardiac disease mortality      | SO2       | 4          | 1.0182        |                      | 41                    |            |                   |                     |                            | 10 µg/m3              | BMC Public Health. 2013 Apr 18;13:360. doi: 10.1186/1471-2458-13-360.                               | China    |
| Cerebrovascular mortality      | NO2       | 5          | 1.0147        |                      | 39                    |            |                   |                     |                            | 10 µg/m3              | BMC Public Health. 2013 Apr 18;13:360. doi: 10.1186/1471-2458-13-360.                               | China    |
| Cerebrovascular mortality      | O3        | 5          | 1.0057        |                      | 29                    |            |                   |                     |                            | 10 µg/m3              | BMC Public Health. 2013 Apr 18;13:360. doi: 10.1186/1471-2458-13-360.                               | China    |
| Cerebrovascular mortality      | PM10      | 5          | 1.0057        |                      | 18                    |            |                   |                     |                            | 10 µg/m3              | BMC Public Health. 2013 Apr 18;13:360. doi: 10.1186/1471-2458-13-360.                               | China    |
| Cerebrovascular mortality      | SO2       | 5          | 1.0079        |                      | 26                    |            |                   |                     |                            | 10 µg/m3              | BMC Public Health. 2013 Apr 18;13:360. doi: 10.1186/1471-2458-13-360.                               | China    |
| Cerebrovascular mortality      | PM10      | 20         | 1.0044        | (1.0022-1.0066)      |                       |            |                   |                     |                            | 10 µg/m3              | Environ Int. 2020 Sep;142:105876. doi: 10.1016/j.envint.2020.105876. Epub 2020 Jun 23.              | Global   |
| Cerebrovascular mortality      | PM10      | 11         | 1.005         | (1.003-1.007)        |                       |            |                   |                     |                            | 10 µg/m3              | J Am Heart Assoc. 2014 Aug 7;3(4):e000983. doi: 10.1161/JAHA.114.000983.                            | Global   |
| Cerebrovascular mortality      | PM2.5     | 7          | 1.0072        | (1.0012-1.0132)      |                       |            |                   |                     |                            | 10 µg/m3              | Environ Int. 2020 Sep;142:105876. doi: 10.1016/j.envint.2020.105876. Epub 2020 Jun 23.              | Global   |
| Cerebrovascular mortality      | PM2.5     | 5          | 1.014         | (1.009-1.019)        |                       |            |                   |                     |                            | 10 µg/m3              | J Am Heart Assoc. 2014 Aug 7;3(4):e000983. doi: 10.1161/JAHA.114.000983.                            | Global   |
| CVD mortality*                 | BC        | 8          | 1.006         | (1.003-1.009)        |                       |            |                   |                     |                            | 10 µg/m3              | Environ Pollut. 2023 May 1;324:121086. doi: 10.1016/j.envpol.2023.121086. Epub 2023 Jan 14.         | Global   |
| CVD mortality*                 | NO2       | 15         | 1.0162        |                      | 22                    |            |                   |                     |                            | 10 µg/m3              | BMC Public Health. 2013 Apr 18;13:360. doi: 10.1186/1471-2458-13-360.                               | China    |
| CVD mortality                  | NO2       | 10         |               |                      |                       |            |                   | 1.07                | (0.43-1.72)                | 10 µg/m3              | BMJ Open. 2016 Jul 21;6(7):e010751. doi: 10.1136/bmjopen-2015-010751.                               | Global   |
| CVD mortality*                 | O3        | 15         | 1.0051        |                      | 13                    |            |                   |                     |                            | 10 µg/m3              | BMC Public Health. 2013 Apr 18;13:360. doi: 10.1186/1471-2458-13-360.                               | China    |
| CVD mortality*                 | PM10      | 44         | 1.006         | (1.0044-1.0077)      |                       |            |                   |                     |                            | 10 µg/m3              | Environ Int. 2020 Sep;142:105876. doi: 10.1016/j.envint.2020.105876. Epub 2020 Jun 23.              | Global   |
| CVD mortality                  | PM10      | 15         | 1.0049        |                      | 7                     |            |                   |                     |                            | 10 µg/m3              | BMC Public Health. 2013 Apr 18;13:360. doi: 10.1186/1471-2458-13-360.                               | China    |
| CVD mortality                  | PM10      | 4          |               |                      |                       |            |                   | 0.48                | (0.18-0.78)                | 10 µg/m3              | BMJ Open. 2016 Jul 21;6(7):e010751. doi: 10.1136/bmjopen-2015-010751.                               | Global   |
| CVD mortality*                 | PM2.5     | 28         | 1.0092        | (1.0061-1.0123)      |                       |            |                   |                     |                            | 10 µg/m3              | Environ Int. 2020 Sep;142:105876. doi: 10.1016/j.envint.2020.105876. Epub 2020 Jun 23.              | Global   |
| CVD mortality*                 | SO2       | 15         | 1.0072        |                      | 17                    |            |                   |                     |                            | 10 µg/m3              | BMC Public Health. 2013 Apr 18;13:360. doi: 10.1186/1471-2458-13-360.                               | China    |
| Diastolic blood pressure       | PM10      | 6          |               |                      |                       | 1.28       | (1.02-1.60)       |                     |                            | 10 µg/m3              | Blood Press. 2016 Jun;25(3):169-76. doi: 10.3109/08037051.2015.1111019. Epub 2015 Dec 4.            | Global   |
| Diastolic blood pressure       | PM2.5     | 11         |               |                      |                       | 1.12       | (0.74-1.69)       |                     |                            | 10 µg/m3              | Blood Press. 2016 Jun;25(3):169-76. doi: 10.3109/08037051.2015.1111019. Epub 2015 Dec 4.            | Global   |
| Heart failure                  | CO        | 20         | 1.0348        | (1.0233-1.048)       |                       |            |                   |                     |                            | 1 mg/m3               | Front Public Health. 2023 Jan 23;10:948765. doi: 10.3389/fpubh.2022.948765. eCollection 2022.       | Global   |
| Heart failure                  | CO        | 12         | 1.035         | (1.025-1.045)        |                       |            |                   |                     |                            | 1 ppm                 | Lancet. 2013 Sep 21;382(9897):1039-48. doi: 10.1016/S0140-6736(13)60898-3. Epub 2013 Jul 10.        | Global   |
| Heart failure*                 | CO        | 41         | 1.032         | (1.023-1.042)        |                       |            |                   |                     |                            | 1 ppm                 | Environ Health Perspect. 2023 Jul;131(7):76001. doi: 10.1289/EHP11506. Epub 2023 Jul 3.             | Global   |
| Heart failure*                 | NO2       | 44         | 1.038         | (1.019-1.057)        |                       |            |                   |                     |                            | 10ppb                 | Environ Health Perspect. 2023 Jul;131(7):76001. doi: 10.1289/EHP11506. Epub 2023 Jul 3.             | Global   |
| Heart failure                  | NO2       | 19         | 1.0207        | (1.0138-1.0277)      |                       |            |                   |                     |                            | 10ppb                 | Front Public Health. 2023 Jan 23;10:948765. doi: 10.3389/fpubh.2022.948765. eCollection 2022.       | Global   |
| Heart failure                  | NO2       | 8          |               |                      |                       | 1.016      | (1.005-1.026)     |                     |                            | 10 µg/m3              | Sci Total Environ. 2023 May 10;872:162191. doi: 10.1016/j.scitotenv.2023.162191. Epub 2023 Feb 11.  | Global   |
| Heart failure                  | NO2       | 10         | 1.017         | (1.012-1.022)        |                       |            |                   |                     |                            | 10 ppb                | Lancet. 2013 Sep 21;382(9897):1039-48. doi: 10.1016/S0140-6736(13)60898-3. Epub 2013 Jul 10.        | Global   |
| Heart failure                  | O3        | 19         | 1.0095        | (1.0024-1.0166)      |                       |            |                   |                     |                            | 10ppb                 | Front Public Health. 2023 Jan 23;10:948765. doi: 10.3389/fpubh.2022.948765. eCollection 2022.       | Global   |
| Heart failure                  | O3        | 40         | 1.01          | (0.998-1.021)        |                       |            |                   |                     |                            | 10ppb                 | Environ Health Perspect. 2023 Jul;131(7):76001. doi: 10.1289/EHP11506. Epub 2023 Jul 3.             | Global   |
| Heart failure*                 | PM10      | 49         | 1.016         | (1.011-1.020)        |                       |            |                   |                     |                            | 10 µg/m3              | Environ Health Perspect. 2023 Jul;131(7):76001. doi: 10.1289/EHP11506. Epub 2023 Jul 3.             | Global   |
| Heart failure                  | PM10      | 27         | 1.013         | (1.0102-1.0157)      |                       |            |                   |                     |                            | 10 µg/m3              | Front Public Health. 2023 Jan 23;10:948765. doi: 10.3389/fpubh.2022.948765. eCollection 2022.       | Global   |
| Heart failure                  | PM10      | 10         |               |                      |                       | 1.012      | (1.007-1.017)     |                     |                            | 10 µg/m3              | Sci Total Environ. 2023 May 10;872:162191. doi: 10.1016/j.scitotenv.2023.162191. Epub 2023 Feb 11.  | Global   |
| Heart failure*                 | PM2.5     | 65         | 1.018         | (1.011-1.025)        |                       |            |                   |                     |                            | 10 µg/m3              | Environ Health Perspect. 2023 Jul;131(7):76001. doi: 10.1289/EHP11506. Epub 2023 Jul 3.             | Global   |

| Cardiovascular condition                | Pollutant | Study size | Relative Risk | Relative Risk 95% CI | Standard error in 10- | Odds Ratio | Odds Ratio 95% CI | Percentage increase | Percentage increase 95% CI | Increase in pollutant | Study                                                                                                | Coverage |
|-----------------------------------------|-----------|------------|---------------|----------------------|-----------------------|------------|-------------------|---------------------|----------------------------|-----------------------|------------------------------------------------------------------------------------------------------|----------|
| Heart failure                           | PM2.5     | 28         | 1.0129        | (1.0093-1.0165)      |                       |            |                   |                     |                            | 10 µg/m3              | Front Public Health. 2023 Jan 23;10:948765. doi: 10.3389/fpubh.2022.948765. eCollection 2022.        | Global   |
| Heart failure                           | PM2.5     | 13         |               |                      |                       | 1.019      | (1.008-1.030)     |                     |                            | 10 µg/m3              | Sci Total Environ. 2023 May 10;872:162191. doi: 10.1016/j.scitotenv.2023.162191. Epub 2023 Feb 11.   | Global   |
| Heart failure                           | SO2       | 18         | 1.022         | (1.0108-1.0335)      |                       |            |                   |                     |                            | 1 ppb                 | Front Public Health. 2023 Jan 23;10:948765. doi: 10.3389/fpubh.2022.948765. eCollection 2022.        | Global   |
| Heart failure*                          | SO2       | 38         | 1.032         | (1.017-1.048)        |                       |            |                   |                     |                            | 10ppb                 | Environ Health Perspect. 2023 Jul;131(7):76001. doi: 10.1289/EHP11506. Epub 2023 Jul 3.              | Global   |
| Heart failure mortality/hospitalisation | O3        | 2          | 1.005         | (0.999-1.011)        |                       |            |                   |                     |                            | 10 ppb                | Lancet. 2013 Sep 21;382(9897):1039-48. doi: 10.1016/S0140-6736(13)60898-3. Epub 2013 Jul 10.         | Global   |
| Heart failure mortality/hospitalisation | PM10      | 6          | 1.016         | (1.012-1.021)        |                       |            |                   |                     |                            | 10 µg/m3              | Lancet. 2013 Sep 21;382(9897):1039-48. doi: 10.1016/S0140-6736(13)60898-3. Epub 2013 Jul 10.         | Global   |
| Heart failure mortality/hospitalisation | PM2.5     | 6          | 1.021         | (1.014-1.028)        |                       |            |                   |                     |                            | 10 µg/m3              | Lancet. 2013 Sep 21;382(9897):1039-48. doi: 10.1016/S0140-6736(13)60898-3. Epub 2013 Jul 10.         | Global   |
| Heart failure mortality/hospitalisation | SO2       | 6          | 1.024         | (1.014-1.034)        |                       |            |                   |                     |                            | 10 ppb                | Lancet. 2013 Sep 21;382(9897):1039-48. doi: 10.1016/S0140-6736(13)60898-3. Epub 2013 Jul 10.         | Global   |
| Hypertension                            | NO2       | 3          |               |                      |                       | 1.037      | (0.994-1.082)     |                     |                            | 10 µg/m3              | Hypertension. 2016 Jul;68(1):62-70. doi: 10.1161/HYPERTENSIONAHA.116.07218. Epub 2016 May 31.        | Global   |
| Hypertension                            | PM10      | 4          |               |                      |                       | 1.024      | (1.017-1.030)     |                     |                            | 10 µg/m3              | Hypertension. 2016 Jul;68(1):62-70. doi: 10.1161/HYPERTENSIONAHA.116.07218. Epub 2016 May 31.        | Global   |
| Hypertension                            | PM2.5     | 3          |               |                      |                       | 1.069      | (1.003-1.141)     |                     |                            | 10 µg/m3              | Hypertension. 2016 Jul;68(1):62-70. doi: 10.1161/HYPERTENSIONAHA.116.07218. Epub 2016 May 31.        | Global   |
| Hypertension                            | SO2       | 3          |               |                      |                       | 1.046      | (1.012-1.081)     |                     |                            | 10 µg/m3              | Hypertension. 2016 Jul;68(1):62-70. doi: 10.1161/HYPERTENSIONAHA.116.07218. Epub 2016 May 31.        | Global   |
| IHD morbidity                           | NO2       | 34         |               |                      |                       | 1.074      | (1.052-1.097)     |                     |                            | 10ppb                 | Environ Health. 2020 May 1;19(1):47. doi: 10.1186/s12940-020-00601-1.                                | Global   |
| IHD morbidity                           | NO2       | 41         | 1.022         | (1.016-1.029)        |                       |            |                   |                     |                            | 10ppb                 | Environ Health. 2020 May 1;19(1):47. doi: 10.1186/s12940-020-00601-1.                                | Global   |
| IHD mortality                           | NO2       | 2          | 1.013         |                      | 118                   |            |                   |                     |                            | 10 µg/m3              | BMC Public Health. 2013 Apr 18;13:360. doi: 10.1186/1471-2458-13-360.                                | China    |
| IHD mortality                           | PM10      | 2          | 0.9963        |                      | 52                    |            |                   |                     |                            | 10 µg/m3              | BMC Public Health. 2013 Apr 18;13:360. doi: 10.1186/1471-2458-13-360.                                | China    |
| IHD mortality                           | PM2.5     | 3          |               |                      |                       |            |                   | 3.36                | (0.68-6.10)                | 10 µg/m3              | Thorax. 2014 Jul;69(7):660-5. doi: 10.1136/thoraxjnl-2013-204492. Epub 2014 Apr 4.                   | Global   |
| IHD mortality                           | SO2       | 2          | 1.028         |                      | 82                    |            |                   |                     |                            | 10 µg/m3              | BMC Public Health. 2013 Apr 18;13:360. doi: 10.1186/1471-2458-13-360.                                | China    |
| MI hospitalization                      | PM2.5     | 16         | 1.024         | (1.007-1.041)        |                       |            |                   |                     |                            | 10 µg/m3              | Environ Sci Pollut Res Int. 2016 Apr;23(7):6139-48. doi: 10.1007/s11356-016-6186-3. Epub 2016 Feb 5. | Global   |
| MI mortality                            | PM10      | 4          | 1.008         | (1.004-1.012)        |                       |            |                   |                     |                            | 10 µg/m3              | Environ Sci Pollut Res Int. 2016 Apr;23(7):6139-48. doi: 10.1007/s11356-016-6186-3. Epub 2016 Feb 5. | Global   |
| MI mortality                            | PM2.5     | 4          | 1.012         | (1.010-1.015)        |                       |            |                   |                     |                            | 10 µg/m3              | Environ Sci Pollut Res Int. 2016 Apr;23(7):6139-48. doi: 10.1007/s11356-016-6186-3. Epub 2016 Feb 5. | Global   |
| Myocardial infarction risk*             | CO        | 20         | 1.048         | (1.026-1.070)        |                       |            |                   |                     |                            | 1 mg/m3               | JAMA. 2012 Feb 15;307(7):713-21. doi: 10.1001/jama.2012.126.                                         | Global   |
| Myocardial infarction risk*             | NO2       | 21         | 1.011         | (1.006-1.016)        |                       |            |                   |                     |                            | 10 µg/m3              | JAMA. 2012 Feb 15;307(7):713-21. doi: 10.1001/jama.2012.126.                                         | Global   |
| Myocardial infarction risk              | O3        | 19         | 1.003         | (0.997-1.010)        |                       |            |                   |                     |                            | 10 µg/m3              | JAMA. 2012 Feb 15;307(7):713-21. doi: 10.1001/jama.2012.126.                                         | Global   |
| Myocardial infarction risk*             | PM10      | 17         | 1.006         | (1.002-1.009)        |                       |            |                   |                     |                            | 10 µg/m3              | JAMA. 2012 Feb 15;307(7):713-21. doi: 10.1001/jama.2012.126.                                         | Global   |
| Myocardial infarction risk*             | PM2.5     | 13         | 1.025         | (1.015-1.036)        |                       |            |                   |                     |                            | 10 µg/m3              | JAMA. 2012 Feb 15;307(7):713-21. doi: 10.1001/jama.2012.126.                                         | Global   |
| Myocardial infarction risk*             | SO2       | 14         | 1.01          | (1.003-1.017)        |                       |            |                   |                     |                            | 10 µg/m3              | JAMA. 2012 Feb 15;307(7):713-21. doi: 10.1001/jama.2012.126.                                         | Global   |
| Stroke incidence                        | CO        | 5          |               |                      |                       | 0.999      | (0.997-1.001)     |                     |                            | 10 µg/m3              | Environ Health Prev Med. 2021 Jan 26;26(1):15. doi: 10.1186/s12199-021-00937-1.                      | Global   |
| Stroke incidence                        | NO2       | 7          |               |                      |                       | 1.002      | (1.000-1.003)     |                     |                            | 10 µg/m3              | Environ Health Prev Med. 2021 Jan 26;26(1):15. doi: 10.1186/s12199-021-00937-1.                      | Global   |
| Stroke incidence                        | O3        | 10         |               |                      |                       | 0.999      | (0.999-1.000)     |                     |                            | 10 µg/m3              | Environ Health Prev Med. 2021 Jan 26;26(1):15. doi: 10.1186/s12199-021-00937-1.                      | Global   |
| Stroke incidence                        | PM10      | 13         |               |                      |                       | 1.017      | (0.981-1.055)     |                     |                            | 10 µg/m3              | Environ Health Prev Med. 2021 Jan 26;26(1):15. doi: 10.1186/s12199-021-00937-1.                      | Global   |
| Stroke incidence                        | PM2.5     | 18         |               |                      |                       | 1.048      | (1.020-1.076)     |                     |                            | 10 µg/m3              | Environ Health Prev Med. 2021 Jan 26;26(1):15. doi: 10.1186/s12199-021-00937-1.                      | Global   |
| Stroke incidence                        | SO2       | 4          |               |                      |                       | 1.002      | (1.000-1.003)     |                     |                            | 10 µg/m3              | Environ Health Prev Med. 2021 Jan 26;26(1):15. doi: 10.1186/s12199-021-00937-1.                      | Global   |
| Stroke mortality                        | CO        | 5          |               |                      |                       | 1.045      | (0.980-1.115)     |                     |                            | 10 µg/m3              | Environ Health Prev Med. 2021 Jan 26;26(1):15. doi: 10.1186/s12199-021-00937-1.                      | Global   |
| Stroke mortality                        | CO        | 37         | 1.054         | (0.999-1.108)        |                       |            |                   |                     |                            | 1 ppm                 | BMJ. 2015 Mar 24;350:h1295. doi: 10.1136/bmj.h1295.                                                  | Global   |
| Stroke mortality*                       | NO2       | 70         | 1.016         | (1.007-1.023)        |                       |            |                   |                     |                            | 10 ppb                | BMJ. 2015 Mar 24;350:h1295. doi: 10.1136/bmj.h1295.                                                  | Global   |
| Stroke mortality                        | NO2       | 5          |               |                      |                       |            |                   | 1.76                | (0.68-2.85)                | 10 µg/m3              | BMJ Open. 2016 Jul 21;6(7):e010751. doi: 10.1136/bmjopen-2015-010751.                                | Global   |
| Stroke mortality                        | NO2       | 10         |               |                      |                       | 1.009      | (1.003-1.016)     |                     |                            | 10 µg/m3              | Environ Health Prev Med. 2021 Jan 26;26(1):15. doi: 10.1186/s12199-021-00937-1.                      | Global   |
| Stroke mortality                        | O3        | 6          |               |                      |                       | 1.005      | (0.999-1.010)     |                     |                            | 10 µg/m3              | Environ Health Prev Med. 2021 Jan 26;26(1):15. doi: 10.1186/s12199-021-00937-1.                      | Global   |
| Stroke mortality*                       | O3        | 53         | 1.004         | (1.001-1.006)        |                       |            |                   |                     |                            | 10 ppb                | BMJ. 2015 Mar 24;350:h1295. doi: 10.1136/bmj.h1295.                                                  | Global   |
| Stroke mortality*                       | PM10      | 78         | 1.003         | (1.002-1.004)        |                       |            |                   |                     |                            | 10 µg/m3              | BMJ. 2015 Mar 24;350:h1295. doi: 10.1136/bmj.h1295.                                                  | Global   |
| Stroke mortality                        | PM10      | 10         |               |                      |                       | 1.006      | (1.003-1.010)     |                     |                            | 10 µg/m3              | Environ Health Prev Med. 2021 Jan 26;26(1):15. doi: 10.1186/s12199-021-00937-1.                      | Global   |
| Stroke mortality                        | PM2.5     | 12         |               |                      |                       | 1.008      | (1.005-1.012)     |                     |                            | 10 µg/m3              | Environ Health Prev Med. 2021 Jan 26;26(1):15. doi: 10.1186/s12199-021-00937-1.                      | Global   |
| Stroke mortality                        | PM2.5     | 3          |               |                      |                       |            |                   | 1.85                | (0.74-2.97)                | 10 µg/m3              | Thorax. 2014 Jul;69(7):660-5. doi: 10.1136/thoraxjnl-2013-204492. Epub 2014 Apr 4.                   | Global   |
| Stroke mortality*                       | PM2.5     | 41         | 1.012         | (1.011-1.012)        |                       |            |                   |                     |                            | 10 µg/m3              | BMJ. 2015 Mar 24;350:h1295. doi: 10.1136/bmj.h1295.                                                  | Global   |
| Stroke mortality                        | SO2       | 6          |               |                      |                       | 1.006      | (1.005-1.008)     |                     |                            | 10 µg/m3              | Environ Health Prev Med. 2021 Jan 26;26(1):15. doi: 10.1186/s12199-021-00937-1.                      | Global   |
| Stroke mortality*                       | SO2       | 52         | 1.022         | (1.014-1.031)        |                       |            |                   |                     |                            | 10 ppb                | BMJ. 2015 Mar 24;350:h1295. doi: 10.1136/bmj.h1295.                                                  | Global   |
| Systolic blood pressure                 | PM10      | 6          |               |                      |                       | 1.25       | (0.99-1.58)       |                     |                            | 10 µg/m3              | Blood Press. 2016 Jun;25(3):169-76. doi: 10.3109/08037051.2015.1111019. Epub 2015 Dec 4.             | Global   |
| Systolic blood pressure                 | PM2.5     | 11         |               |                      |                       | 1.38       | (0.84-2.28)       |                     |                            | 10 µg/m3              | Blood Press. 2016 Jun;25(3):169-76. doi: 10.3109/08037051.2015.1111019. Epub 2015 Dec 4.             | Global   |

Appendix Table 2: Full set of meta-analysis data, long-term effect of air pollution

| Cardiovascular condition             | Pollutant | Study size | Relative Risk | Relative Risk 95% CI | Odds Ratio     | Odds Ratio 95% CI | Hazard Ratio | Hazard Ratio 95% CI | Percentage increase                                      | Percentage increase 95% CI | Increase in pollutant | Study                                                                                                       | Coverage |
|--------------------------------------|-----------|------------|---------------|----------------------|----------------|-------------------|--------------|---------------------|----------------------------------------------------------|----------------------------|-----------------------|-------------------------------------------------------------------------------------------------------------|----------|
| Acute coronary events                | NOx       |            | 11            |                      |                |                   | 1.01         | (0.98-1.05)         |                                                          |                            | 20 µg/m3              | BMJ. 2014 Jan 21;348:f7412. doi: 10.1136/bmj.f7412.                                                         | Europe   |
| Acute coronary events                | NO2       |            | 11            |                      |                |                   | 1.03         | (0.97-1.08)         |                                                          |                            | 10 µg/m3              | BMJ. 2014 Jan 21;348:f7412. doi: 10.1136/bmj.f7412.                                                         | Europe   |
| Acute coronary events                | PM10      |            | 11            |                      |                |                   | 1.12         | (1.01-1.25)         |                                                          |                            | 10 µg/m3              | BMJ. 2014 Jan 21;348:f7412. doi: 10.1136/bmj.f7412.                                                         | Europe   |
| Acute coronary events                | PM2.5     |            | 11            |                      |                |                   | 1.13         | (0.98-1.30)         |                                                          |                            | 5 µg/m3               | BMJ. 2014 Jan 21;348:f7412. doi: 10.1136/bmj.f7412.                                                         | Europe   |
| Atrial Fibrillation incidence        | CO        |            | 2             |                      |                |                   | 1.017        | (1.013-1.022)       |                                                          |                            | 1000 ppb              | Int Heart J. 2021 Mar 30;62(2):290-297. doi: 10.1536/ihj.20-523. Epub 2021 Mar 6.                           | Global   |
| Atrial Fibrillation incidence        | NO2       |            | 4             |                      |                |                   | 1.017        | (1.001-1.033)       |                                                          |                            | 10 ppb                | Int Heart J. 2021 Mar 30;62(2):290-297. doi: 10.1536/ihj.20-523. Epub 2021 Mar 6.                           | Global   |
| Atrial Fibrillation incidence        | NO2       |            | 2             |                      |                |                   | 1.01         | (1.01-1.02)         |                                                          |                            | 10 µg/m3              | J Evid Based Med. 2020 May;13(2):102-115. doi: 10.1111/ebm.12380. Epub 2020 Mar 13.                         | Global   |
| Atrial Fibrillation incidence        | O3        |            | 3             |                      |                |                   | 1.007        | (0.927-1.094)       |                                                          |                            | 10 ppb                | Int Heart J. 2021 Mar 30;62(2):290-297. doi: 10.1536/ihj.20-523. Epub 2021 Mar 6.                           | Global   |
| Atrial Fibrillation incidence        | PM10      |            | 4             |                      |                |                   | 1.034        | (1.032-1.035)       |                                                          |                            | 10 µg/m3              | Int Heart J. 2021 Mar 30;62(2):290-297. doi: 10.1536/ihj.20-523. Epub 2021 Mar 6.                           | Global   |
| Atrial Fibrillation incidence        | PM10      |            | 4             |                      |                |                   | 0.91         | (0.74-1.12)         |                                                          |                            | 10 µg/m3              | J Evid Based Med. 2020 May;13(2):102-115. doi: 10.1111/ebm.12380. Epub 2020 Mar 13.                         | Global   |
| Atrial Fibrillation incidence        | PM2.5     |            | 4             |                      |                |                   | 0.93         | (0.68-1.27)         |                                                          |                            | 5 and 10 µg/m3        | J Evid Based Med. 2020 May;13(2):102-115. doi: 10.1111/ebm.12380. Epub 2020 Mar 13.                         | Global   |
| Atrial Fibrillation incidence        | SO2       |            | 2             |                      |                |                   | 1.005        | (1.004-1.007)       |                                                          |                            | 10 ppb                | Int Heart J. 2021 Mar 30;62(2):290-297. doi: 10.1536/ihj.20-523. Epub 2021 Mar 6.                           | Global   |
| Atrial Fibrillation incidence*       | PM2.5     |            | 6             |                      |                |                   | 1.116        | (1.031-1.207)       |                                                          |                            | 10 µg/m3              | Int Heart J. 2021 Mar 30;62(2):290-297. doi: 10.1536/ihj.20-523. Epub 2021 Mar 6.                           | Global   |
| Atrial fibrillation prevalence       | NO2       |            | 3             |                      | 1.02           | (1.00-1.04)       |              |                     |                                                          |                            | 10 ppb                | Ecotoxicol Environ Saf. 2021 Jan 15;208:111508. doi: 10.1016/j.ecoenv.2020.111508. Epub 2020 Nov 1.         | Global   |
| Atrial fibrillation prevalence       | PM10      |            | 3             |                      | 1.03           | (1.03-1.04)       |              |                     |                                                          |                            | 10 µg/m3              | Ecotoxicol Environ Saf. 2021 Jan 15;208:111508. doi: 10.1016/j.ecoenv.2020.111508. Epub 2020 Nov 1.         | Global   |
| Atrial fibrillation prevalence       | PM2.5     |            | 4             |                      | 1.07           | (1.04-1.10)       |              |                     |                                                          |                            | 10 µg/m3              | Ecotoxicol Environ Saf. 2021 Jan 15;208:111508. doi: 10.1016/j.ecoenv.2020.111508. Epub 2020 Nov 1.         | Global   |
| Cerebrovascular mortality            | BC        |            | 3             | 1.082                | (0.920-1.273)  |                   |              |                     |                                                          |                            | 10 µg/m3              | Environ Pollut. 2023 May 1;324:121086. doi: 10.1016/j.envpol.2023.121086. Epub 2023 Jan 14.                 | Global   |
| Cerebrovascular mortality            | NO2       |            | 17            |                      |                |                   | 1.167        | (0.936-1.456)       |                                                          |                            | 10 ppb                | PLoS One. 2021 Feb 4;16(2):e0246451. doi: 10.1371/journal.pone.0246451. eCollection 2021.                   | Global   |
| Cerebrovascular mortality            | PM2.5     | n=3740     |               |                      |                |                   | 1.128        | (1.048-1.214)       |                                                          |                            | 5 µg/m3               | Res Rep Health Eff Inst. 2021 Sep;201(208):1-127.                                                           | Europe   |
| Cerebrovascular mortality            | BC        | n=3740     |               |                      |                |                   | 1.075        | (1.016-1.138)       |                                                          |                            | 0.5x10-5/m            | Res Rep Health Eff Inst. 2021 Sep;201(208):1-127.                                                           | Europe   |
| Cerebrovascular mortality            | NO2       | n=3740     |               |                      |                |                   | 1.068        | (1.011-1.129)       |                                                          |                            | 10 µg/m3              | Res Rep Health Eff Inst. 2021 Sep;201(208):1-127.                                                           | Europe   |
| Cerebrovascular mortality            | O3        | n=3740     |               |                      |                |                   | 0.882        | (0.817-0.953)       |                                                          |                            | 10 µg/m3              | Res Rep Health Eff Inst. 2021 Sep;201(208):1-127.                                                           | Europe   |
| Cerebrovascular mortality            | PM2.5     | n=3740     |               |                      |                |                   | 1.24         | (1.13-1.36)         |                                                          |                            | 10 µg/m3              | J Am Heart Assoc. 2021 Jan 5;10(1):e016890. doi: 10.1161/JAHA.120.016890. Epub 2020 Dec 31.                 | Global   |
| Coronary heart disease incidence     | BC        | n=137148   |               |                      |                |                   | 1.02         | (0.99-1.06)         |                                                          |                            | 10-5/m                | Lancet Planet Health. 2021 Sep;5(9):e620-e632. doi: 10.1016/S2542-5196(21)00195-9.                          | Europe   |
| Coronary heart disease incidence     | NO2       | n=137148   |               |                      |                |                   | 1.04         | (1.01-1.07)         |                                                          |                            | 10 µg/m3              | Lancet Planet Health. 2021 Sep;5(9):e620-e632. doi: 10.1016/S2542-5196(21)00195-9.                          | Europe   |
| Coronary heart disease incidence     | O3        | n=137148   |               |                      |                |                   | 0.94         | (0.90-0.98)         |                                                          |                            | 10 µg/m3              | Lancet Planet Health. 2021 Sep;5(9):e620-e632. doi: 10.1016/S2542-5196(21)00195-9.                          | Europe   |
| Coronary heart disease incidence     | PM2.5     | n=137148   |               |                      |                |                   | 1.02         | (0.95-1.10)         |                                                          |                            | 5 µg/m3               | Lancet Planet Health. 2021 Sep;5(9):e620-e632. doi: 10.1016/S2542-5196(21)00195-9.                          | Europe   |
| Coronary heart disease incidence     | NO2       |            | 6             |                      |                |                   | 1.02         | (0.95-1.10)         |                                                          |                            | 10 µg/m3              | J Evid Based Med. 2020 May;13(2):102-115. doi: 10.1111/ebm.12380. Epub 2020 Mar 13.                         | Global   |
| Coronary heart disease incidence     | PM10      |            | 9             |                      |                |                   | 1.09         | (0.98-1.21)         |                                                          |                            | 10 µg/m3              | J Evid Based Med. 2020 May;13(2):102-115. doi: 10.1111/ebm.12380. Epub 2020 Mar 13.                         | Global   |
| Coronary heart disease incidence     | PM2.5     |            | 8             |                      |                |                   | 1.04         | (1.00-1.09)         |                                                          |                            | 5 and 10 µg/m3        | J Evid Based Med. 2020 May;13(2):102-115. doi: 10.1111/ebm.12380. Epub 2020 Mar 13.                         | Global   |
| Coronary heart disease mortality     | BC        |            | 3             | 1.209                | (0.921-1.588)  |                   |              |                     |                                                          |                            | 10 µg/m3              | Environ Pollut. 2023 May 1;324:121086. doi: 10.1016/j.envpol.2023.121086. Epub 2023 Jan 14.                 | Global   |
| CVD morbidity                        | NO2       |            | 10            |                      |                |                   | 1.108        | (1.007-1.219)       |                                                          |                            | 10 µg/m3              | Environ Int. 2023 Aug;178:108060. doi: 10.1016/j.envint.2023.108060. Epub 2023 Jun 23.                      | China    |
| CVD morbidity                        | PM2.5     |            | 5             |                      |                |                   | 1.09         | (1.00-1.18)         |                                                          |                            | 10 µg/m3              | Curr Probl Cardiol. 2023 Jun;48(6):101670. doi: 10.1016/j.cpcardiol.2023.101670. Epub 2023 Feb 23.          | Global   |
| CVD morbidity                        | PM10      |            | 7             | 1.07                 | (1.01-1.13)    |                   |              |                     |                                                          |                            | 10 µg/m3              | Front Public Health. 2023 Mar 28;11:1134341. doi: 10.3389/fpubh.2023.1134341. eCollection 2023.             | LMIC     |
| CVD morbidity                        | PM2.5     |            | 10            | 1.11                 | (1.05-1.17)    |                   |              |                     |                                                          |                            | 10 µg/m3              | Front Public Health. 2023 Mar 28;11:1134341. doi: 10.3389/fpubh.2023.1134341. eCollection 2023.             | LMIC     |
| CVD mortality                        | BC        | n=15542    |               |                      |                |                   | 1.085        | (1.055-1.116)       |                                                          |                            | 0.5x10-5/m            | Res Rep Health Eff Inst. 2021 Sep;201(208):1-127.                                                           | Europe   |
| CVD mortality                        | NO2       |            | 29            |                      |                |                   | 1.139        | (0.997-1.301)       |                                                          |                            | 10 ppb                | PLoS One. 2021 Feb 4;16(2):e0246451. doi: 10.1371/journal.pone.0246451. eCollection 2021.                   | Global   |
| CVD mortality                        | NO2       |            | 6             |                      |                |                   | 1.14         | (0.89-1.47)         |                                                          |                            | 10 ppb                | Res Rep Health Eff Inst. 2023 May;201(213):1-53.                                                            | Asia     |
| CVD mortality                        | NO2       | n=15542    |               |                      |                |                   | 1.089        | (1.060-1.120)       |                                                          |                            | 10 µg/m3              | Res Rep Health Eff Inst. 2021 Sep;201(208):1-127.                                                           | Europe   |
| CVD mortality                        | O3        |            | 6             | 1.01                 | (0.99-1.03)    |                   |              |                     |                                                          |                            | 10 ppb                | BMJ Open. 2016 Feb 23;6(2):e009493. doi: 10.1136/bmjopen-2015-009493.                                       | Asia     |
| CVD mortality                        | PM10      |            | 5             | 1.14                 | (0.99-1.30)    |                   |              |                     |                                                          |                            | 10 µg/m3              | Front Public Health. 2023 Mar 28;11:1134341. doi: 10.3389/fpubh.2023.1134341. eCollection 2023.             | Global   |
| CVD mortality                        | PM10      |            | 5             |                      |                |                   | 1.02         | (0.89-1.16)         |                                                          |                            | 10 µg/m3              | Environ Pollut. 2018 Nov;242(Pt B):1299-1307. doi: 10.1016/j.envpol.2018.07.041. Epub 2018 Jul 28.          | Global   |
| CVD mortality                        | PM2.5     |            | 18            |                      |                |                   | 1.1          | (1.07-1.12)         |                                                          |                            | 5 and 10 µg/m3        | J Evid Based Med. 2020 May;13(2):102-115. doi: 10.1111/ebm.12380. Epub 2020 Mar 13.                         | Global   |
| CVD mortality                        | PM2.5     |            | 11            | 1.1                  | (1.06-1.14)    |                   |              |                     |                                                          |                            | 10 µg/m3              | Front Public Health. 2023 Mar 28;11:1134341. doi: 10.3389/fpubh.2023.1134341. eCollection 2023.             | LMIC     |
| CVD mortality                        | PM2.5     |            | 14            |                      |                |                   | 1.12         | (1.07-1.18)         |                                                          |                            | 10 µg/m3              | Curr Probl Cardiol. 2023 Jun;48(6):101670. doi: 10.1016/j.cpcardiol.2023.101670. Epub 2023 Feb 23.          | Global   |
| CVD mortality                        | PM2.5     |            | 6             |                      |                |                   | 1.05         | (0.99-1.12)         |                                                          |                            | 5 µg/m3               | Res Rep Health Eff Inst. 2023 May;201(213):1-53.                                                            | Asia     |
| CVD mortality                        | PM2.5     |            | 11            |                      |                |                   | 1.12         | (1.08-1.16)         |                                                          |                            | 10 µg/m3              | Environ Pollut. 2018 Nov;242(Pt B):1299-1307. doi: 10.1016/j.envpol.2018.07.041. Epub 2018 Jul 28.          | Global   |
| CVD mortality                        | PM2.5     | n=15542    |               |                      |                |                   | 1.135        | (1.095-1.176)       |                                                          |                            | 5 µg/m3               | Res Rep Health Eff Inst. 2021 Sep;201(208):1-127.                                                           | Europe   |
| CVD mortality                        | BC        |            | 13            | 1.093                | (0.955-1.250)  |                   |              |                     |                                                          |                            | 10 µg/m3              | Environ Pollut. 2023 May 1;324:121086. doi: 10.1016/j.envpol.2023.121086. Epub 2023 Jan 14.                 | Global   |
| CVD mortality*                       | NO2       |            | 13            |                      |                |                   | 1.17         | (1.10-1.25)         |                                                          |                            | 10 µg/m3              | J Evid Based Med. 2020 May;13(2):102-115. doi: 10.1111/ebm.12380. Epub 2020 Mar 13.                         | Global   |
| CVD mortality*                       | O3        | n=15542    |               |                      |                |                   | 0.887        | (0.854-0.922)       |                                                          |                            | 10 µg/m3              | Res Rep Health Eff Inst. 2021 Sep;201(208):1-127.                                                           | Europe   |
| CVD mortality*                       | PM10      |            | 11            |                      |                |                   | 1.17         | (1.04-1.30)         |                                                          |                            | 10 µg/m3              | J Evid Based Med. 2020 May;13(2):102-115. doi: 10.1111/ebm.12380. Epub 2020 Mar 13.                         | Global   |
| CVD mortality*                       | PM2.5     |            | 28            |                      |                |                   | 1.14         | (1.08-1.21)         |                                                          |                            | 10 µg/m3              | J Am Heart Assoc. 2021 Jan 5;10(1):e016890. doi: 10.1161/JAHA.120.016890. Epub 2020 Dec 31.                 | Global   |
| Diastolic blood pressure             | PM10      |            | 1             |                      | 1.18           | (1.04-1.34)       |              |                     |                                                          |                            | 10 µg/m3              | Blood Press. 2016 Jun;25(3):169-76. doi: 10.3109/08037051.2015.1111019. Epub 2015 Dec 4.                    | Global   |
| Diastolic blood pressure             | PM2.5     |            | 2             |                      | 4.52           | (0.23-89.77)      |              |                     |                                                          |                            | 10 µg/m3              | Blood Press. 2016 Jun;25(3):169-76. doi: 10.3109/08037051.2015.1111019. Epub 2015 Dec 4.                    | Global   |
| Heart failure incidence              | NO2       |            | 3             |                      |                |                   | 1.42         | (0.93-2.18)         |                                                          |                            | 10 µg/m3              | J Evid Based Med. 2020 May;13(2):102-115. doi: 10.1111/ebm.12380. Epub 2020 Mar 13.                         | Global   |
| Heart failure incidence              | PM10      |            | 5             |                      |                |                   | 1.25         | (1.04-1.50)         |                                                          |                            | 10 µg/m3              | J Evid Based Med. 2020 May;13(2):102-115. doi: 10.1111/ebm.12380. Epub 2020 Mar 13.                         | Global   |
| Heart failure incidence              | PM2.5     |            | 4             |                      |                |                   | 1.07         | (0.72-1.60)         |                                                          |                            | 5 and 10 µg/m3        | J Evid Based Med. 2020 May;13(2):102-115. doi: 10.1111/ebm.12380. Epub 2020 Mar 13.                         | Global   |
| Heart failure incidence-mortality    | CO        |            | 3             | 2.265                | (0.474-10.832) |                   |              |                     |                                                          |                            | 1 ppb                 | Environ Health Perspect. 2023 Jul;131(7):76001. doi: 10.1289/EHP11506. Epub 2023 Jul 3.                     | Global   |
| Heart failure incidence-mortality    | NO2       |            | 8             |                      | 1.072          | (1.028-1.118)     |              |                     |                                                          |                            | 10 µg/m3              | Sci Total Environ. 2023 May 10;872:162191. doi: 10.1016/j.scitotenv.2023.162191. Epub 2023 Feb 11.          | Global   |
| Heart failure incidence-mortality    | O3        |            | 5             | 1.011                | (0.860-1.187)  |                   |              |                     |                                                          |                            | 10ppb                 | Environ Health Perspect. 2023 Jul;131(7):76001. doi: 10.1289/EHP11506. Epub 2023 Jul 3.                     | Global   |
| Heart failure incidence-mortality    | PM10      |            | 8             |                      | 1.19           | (1.045-1.356)     |              |                     |                                                          |                            | 10 µg/m3              | Sci Total Environ. 2023 May 10;872:162191. doi: 10.1016/j.scitotenv.2023.162191. Epub 2023 Feb 11.          | Global   |
| Heart failure incidence-mortality    | PM2.5     |            | 13            |                      | 1.196          | (1.079-1.326)     |              |                     |                                                          |                            | 10 µg/m3              | Sci Total Environ. 2023 May 10;872:162191. doi: 10.1016/j.scitotenv.2023.162191. Epub 2023 Feb 11.          | Global   |
| Heart failure incidence-mortality    | SO2       |            | 2             | 3.929                | (0.282-54.798) |                   |              |                     |                                                          |                            | 10ppb                 | Environ Health Perspect. 2023 Jul;131(7):76001. doi: 10.1289/EHP11506. Epub 2023 Jul 3.                     | Global   |
| Heart failure incidence-mortality*   | NO2       |            | 10            | 1.204                | (1.069-1.356)  |                   |              |                     |                                                          |                            | 10ppb                 | Environ Health Perspect. 2023 Jul;131(7):76001. doi: 10.1289/EHP11506. Epub 2023 Jul 3.                     | Global   |
| Heart failure incidence-mortality*   | PM10      |            | 8             | 1.212                | (1.010-1.454)  |                   |              |                     |                                                          |                            | 10 µg/m3              | Environ Health Perspect. 2023 Jul;131(7):76001. doi: 10.1289/EHP11506. Epub 2023 Jul 3.                     | Global   |
| Heart failure incidence-mortality*   | PM2.5     |            | 15            | 1.748                | (1.112-2.747)  |                   |              |                     |                                                          |                            | 10 µg/m3              | Environ Health Perspect. 2023 Jul;131(7):76001. doi: 10.1289/EHP11506. Epub 2023 Jul 3.                     | Global   |
| Hemorrhagic stroke incidence or mort | PM2.5     |            | 7             |                      |                |                   | 1.1          | (1.04-1.16)         | was not unified, which ranged from 1.4 µg/m3 to 10 µg/m3 |                            |                       | Environ Sci Pollut Res Int. 2021 May;28(17):20970-20980. doi: 10.1007/s11356-021-13074-7. Epub 2021 Mar 10. | Global   |
| Hypertension incidence               | PM2.5     |            | 10            | 1.21                 | (1.07-1.35)    |                   |              |                     |                                                          |                            | 10 µg/m3              | Environ Res. 2022 Mar;204(Pt D):112352. doi: 10.1016/j.envres.2021.112352. Epub 2021 Nov 9.                 | Global   |
| Hypertension incidence-women         | PM2.5     |            | 6             |                      |                |                   | 1.23         | (1.08-1.40)         |                                                          |                            | 10 µg/m3              | Ecotoxicol Environ Saf. 2021 Jan 15;208:111492. doi: 10.1016/j.ecoenv.2020.111492. Epub 2020 Oct 26.        | Global   |
| Hypertension incidence               | PM2.5     |            | 10            |                      |                |                   | 1.07         | (1.01-1.14)         |                                                          |                            | 5 and 10 µg/m3        | J Evid Based Med. 2020 May;13(2):102-115. doi: 10.1111/ebm.12380. Epub 2020 Mar 13.                         | Global   |
| Hypertension prevalence              | NO2       |            | 6             |                      | 1.034          | (1.005-1.063)     |              |                     |                                                          |                            | 10 µg/m3              | Hypertension. 2016 Jul;68(1):62-70. doi: 10.1161/HYPERTENSIONAHA.116.07218. Epub 2016 May 31.               | Global   |
| Hypertension prevalence              | NOx       |            | 4             |                      | 1.127          | (0.933-1.361)     |              |                     |                                                          |                            |                       |                                                                                                             |          |

| Cardiovascular condition      | Pollutant    | Study size | Relative Risk | Relative Risk 95% CI | Odds Ratio | Odds Ratio 95% CI | Hazard Ratio | Hazard Ratio 95% CI | Percentage increase | Percentage increase 95% CI | Increase in pollutant | Study                                                                                                | Coverage |
|-------------------------------|--------------|------------|---------------|----------------------|------------|-------------------|--------------|---------------------|---------------------|----------------------------|-----------------------|------------------------------------------------------------------------------------------------------|----------|
| Hypertension prevalence       | NOx          | 17         |               |                      | 1.01       | (0.98-1.03)       |              |                     |                     |                            | 10 µg/m3              | Sci Total Environ. 2021 Nov 20;796:148620. doi: 10.1016/j.scitotenv.2021.148620. Epub 2021 Jul 7.    | Global   |
| Hypertension prevalence       | O3           | 3          |               |                      | 0.96       | (0.85-1.09)       |              |                     |                     |                            | 10 µg/m3              | Sci Total Environ. 2021 Nov 20;796:148620. doi: 10.1016/j.scitotenv.2021.148620. Epub 2021 Jul 7.    | Global   |
| Hypertension prevalence       | PM10         | 22         |               |                      | 1.04       | (1.02-1.06)       |              |                     |                     |                            | 10 µg/m3              | Sci Total Environ. 2021 Nov 20;796:148620. doi: 10.1016/j.scitotenv.2021.148620. Epub 2021 Jul 7.    | Global   |
| Hypertension prevalence       | PM2.5        | 37         |               |                      | 1.1        | (1.07-1.14)       |              |                     |                     |                            | 10 µg/m3              | Sci Total Environ. 2021 Nov 20;796:148620. doi: 10.1016/j.scitotenv.2021.148620. Epub 2021 Jul 7.    | Global   |
| Hypertension prevalence       | SO2          | 3          |               |                      | 1.21       | (1.08-1.36)       |              |                     |                     |                            | 10 µg/m3              | Sci Total Environ. 2021 Nov 20;796:148620. doi: 10.1016/j.scitotenv.2021.148620. Epub 2021 Jul 7.    | Global   |
| Hypertension prevalence-Child | CO           | 1          |               |                      | 1.009      | (1.007-1.011)     |              |                     |                     |                            | 10 µg/m3              | Sci Total Environ. 2021 Nov 20;796:148620. doi: 10.1016/j.scitotenv.2021.148620. Epub 2021 Jul 7.    | Global   |
| Hypertension prevalence-Child | NO2          | 1          |               |                      | 1.02       | (1.00-1.03)       |              |                     |                     |                            | 10 µg/m3              | Sci Total Environ. 2021 Nov 20;796:148620. doi: 10.1016/j.scitotenv.2021.148620. Epub 2021 Jul 7.    | Global   |
| Hypertension prevalence-Child | O3           | 2          |               |                      | 1.26       | (0.81-1.09)       |              |                     |                     |                            | 10 µg/m3              | Sci Total Environ. 2021 Nov 20;796:148620. doi: 10.1016/j.scitotenv.2021.148620. Epub 2021 Jul 7.    | Global   |
| Hypertension prevalence-Child | PM10         | 2          |               |                      | 1.15       | (1.01-1.32)       |              |                     |                     |                            | 10 µg/m3              | Sci Total Environ. 2021 Nov 20;796:148620. doi: 10.1016/j.scitotenv.2021.148620. Epub 2021 Jul 7.    | Global   |
| Hypertension prevalence-Child | PM2.5        | 2          |               |                      | 2.82       | (0.51-15.68)      |              |                     |                     |                            | 10 µg/m3              | Sci Total Environ. 2021 Nov 20;796:148620. doi: 10.1016/j.scitotenv.2021.148620. Epub 2021 Jul 7.    | Global   |
| Hypertension prevalence-Child | SO2          | 2          |               |                      | 8.57       | (0.13-575.58)     |              |                     |                     |                            | 10 µg/m3              | Sci Total Environ. 2021 Nov 20;796:148620. doi: 10.1016/j.scitotenv.2021.148620. Epub 2021 Jul 7.    | Global   |
| Hypertension prevalence-women | PM2.5        | 4          |               |                      | 1.07       | (1.00-1.14)       |              |                     |                     |                            | 10 µg/m3              | Ecotoxicol Environ Saf. 2021 Jan 15;208:111492. doi: 10.1016/j.ecoenv.2020.111492. Epub 2020 Oct 26. | Global   |
| IHD (women to men ratio-RRR)  | PM2.5        | 9          | 1.05          | (1.02-1.08)          |            |                   |              |                     |                     |                            | 10 µg/m3              | Front Public Health. 2022 Feb 2;10:802167. doi: 10.3389/fpubh.2022.802167. eCollection 2022.         | Global   |
| IHD incidence                 | PM2.5        | 4          | 1.07          | (0.99-1.17)          |            |                   |              |                     |                     |                            | 10 µg/m3              | Perfusion. 2024 Jan;39(1):210-222. doi: 10.1177/02676591221131485. Epub 2022 Nov 7.                  | Global   |
| IHD mortality                 | BC           | n=7265     |               |                      |            |                   | 1.078        | (1.033-1.125)       |                     |                            | 0.5x10-5/m            | Res Rep Health Eff Inst. 2021 Sep;2021(208):1-127.                                                   | Europe   |
| IHD mortality                 | NO2          | 6          |               |                      |            |                   | 1.05         | (1.03-1.08)         |                     |                            | 10 µg/m3              | J Evid Based Med. 2020 May;13(2):102-115. doi: 10.1111/ebm.12380. Epub 2020 Mar 13.                  | Global   |
| IHD mortality                 | NO2          | n=7265     |               |                      |            |                   | 1.098        | (1.053-1.145)       |                     |                            | 10 µg/m3              | Res Rep Health Eff Inst. 2021 Sep;2021(208):1-127.                                                   | Europe   |
| IHD mortality                 | O3           | 4          | 1.02          | (1.00-1.04)          |            |                   |              |                     |                     |                            | 10 ppb                | BMJ Open. 2016 Feb 23;6(2):e009493. doi: 10.1136/bmjopen-2015-009493.                                | Global   |
| IHD mortality                 | PM10         | 5          |               |                      |            |                   | 1.03         | (1.01-1.05)         |                     |                            | 10 µg/m3              | J Evid Based Med. 2020 May;13(2):102-115. doi: 10.1111/ebm.12380. Epub 2020 Mar 13.                  | Global   |
| IHD mortality                 | PM2.5        | 15         |               |                      |            |                   | 1.11         | (1.07-1.16)         |                     |                            | 5 and 10 µg/m3        | J Evid Based Med. 2020 May;13(2):102-115. doi: 10.1111/ebm.12380. Epub 2020 Mar 13.                  | Global   |
| IHD mortality                 | PM2.5        | 23         |               |                      |            |                   | 1.23         | (1.15-1.31)         |                     |                            | 10 µg/m3              | J Am Heart Assoc. 2021 Jan 5;10(1):e016890. doi: 10.1161/JAHA.120.016890. Epub 2020 Dec 31.          | Global   |
| IHD mortality                 | PM2.5        | n=7265     |               |                      |            |                   | 1.111        | (1.056-1.169)       |                     |                            | 5 µg/m3               | Res Rep Health Eff Inst. 2021 Sep;2021(208):1-127.                                                   | Europe   |
| IHD mortality                 | PM2.5        | 22         | 1.16          | (1.10-1.21)          |            |                   |              |                     |                     |                            | 10 µg/m3              | Environ Int. 2020 Oct;143:105974. doi: 10.1016/j.envint.2020.105974. Epub 2020 Jul 20.               | Global   |
| IHD mortality*                | BC           | 8          | 1.149         | (1.024-1.291)        |            |                   |              |                     |                     |                            | 10 µg/m3              | Environ Pollut. 2023 May 1;324:121086. doi: 10.1016/j.envpol.2023.121086. Epub 2023 Jan 14.          | Global   |
| IHD mortality*                | NO2          | 19         |               |                      |            |                   | 1.128        | (1.076-1.182)       |                     |                            | 10 ppb                | PLoS One. 2021 Feb 4;16(2):e0246451. doi: 10.1371/journal.pone.0246451. eCollection 2021.            | Global   |
| IHD mortality*                | O3           | n=7265     |               |                      |            |                   | 0.87         | (0.821-0.921)       |                     |                            | 10 µg/m3              | Res Rep Health Eff Inst. 2021 Sep;2021(208):1-127.                                                   | Europe   |
| IHD mortality*                | PM10         | 13         | 1.06          | (1.01-1.10)          |            |                   |              |                     |                     |                            | 10 µg/m3              | Environ Int. 2020 Oct;143:105974. doi: 10.1016/j.envint.2020.105974. Epub 2020 Jul 20.               | Global   |
| IHD mortality*                | PM2.5        | 24         | 1.21          | (1.15-1.28)          |            |                   |              |                     |                     |                            | 10 µg/m3              | Perfusion. 2024 Jan;39(1):210-222. doi: 10.1177/02676591221131485. Epub 2022 Nov 7.                  | Global   |
| MI incidence                  | PM2.5        | 11         |               |                      |            |                   | 1.08         | (0.99-1.18)         |                     |                            | 10 µg/m3              | J Am Heart Assoc. 2021 Jan 5;10(1):e016890. doi: 10.1161/JAHA.120.016890. Epub 2020 Dec 31.          | Global   |
| MI incidence                  | PM2.5        | 8          |               |                      |            |                   | 1.1          | (1.02-1.18)         |                     |                            | 10 µg/m3              | Chemosphere. 2021 Mar;267:128903. doi: 10.1016/j.chemosphere.2020.128903. Epub 2020 Nov 7.           | Global   |
| Post-MI mortality             | PM2.5        | 4          |               |                      |            |                   | 1.07         | (1.04-1.9)          |                     |                            | 10 µg/m3              | Chemosphere. 2021 Mar;267:128903. doi: 10.1016/j.chemosphere.2020.128903. Epub 2020 Nov 7.           | Global   |
| Stroke incidence              | O3           | n=137148   |               |                      |            |                   | 0.96         | (0.91-1.01)         |                     |                            | 10 µg/m3              | Lancet Planet Health. 2021 Sep;5(9):e620-e632. doi: 10.1016/S2542-5196(21)00195-9.                   | Europe   |
| Stroke incidence              | PM2.5        | 14         |               |                      |            |                   | 1.13         | (1.11-1.15)         |                     |                            | 10 µg/m3              | J Am Heart Assoc. 2021 Jan 5;10(1):e016890. doi: 10.1161/JAHA.120.016890. Epub 2020 Dec 31.          | Global   |
| Stroke incidence              | NO2          | 11         |               |                      |            |                   | 1.13         | (1.00-1.28)         |                     |                            | 10 µg/m3              | J Evid Based Med. 2020 May;13(2):102-115. doi: 10.1111/ebm.12380. Epub 2020 Mar 13.                  | Global   |
| Stroke incidence              | PM10         | 13         |               |                      |            |                   | 1.15         | (0.90-1.47)         |                     |                            | 10 µg/m3              | J Evid Based Med. 2020 May;13(2):102-115. doi: 10.1111/ebm.12380. Epub 2020 Mar 13.                  | Global   |
| Stroke incidence              | PM2.5        | 15         |               |                      |            |                   | 1.13         | (1.06-1.19)         |                     |                            | 5 and 10 µg/m3        | J Evid Based Med. 2020 May;13(2):102-115. doi: 10.1111/ebm.12380. Epub 2020 Mar 13.                  | Global   |
| Stroke incidence              | PM2.5        | 11         | 1             | (0.96-1.04)          |            |                   |              |                     |                     |                            | 10 µg/m3              | Front Public Health. 2022 Feb 2;10:802167. doi: 10.3389/fpubh.2022.802167. eCollection 2022.         | Global   |
| Stroke incidence              | PM10 or conv | 20         |               |                      |            |                   | 1.061        | (1.018-1.105)       |                     |                            | 10 µg/m3              | Stroke. 2015 Nov;46(11):3058-66. doi: 10.1161/STROKEAHA.115.009913. Epub 2015 Oct 13.                | Global   |
| Stroke incidence*             | BC           | n=137148   |               |                      |            |                   | 1.06         | (1.02-1.10)         |                     |                            | 10-5/m                | Lancet Planet Health. 2021 Sep;5(9):e620-e632. doi: 10.1016/S2542-5196(21)00195-9.                   | Europe   |
| Stroke incidence*             | NO2          | n=137148   |               |                      |            |                   | 1.08         | (1.04-1.12)         |                     |                            | 10 µg/m3              | Lancet Planet Health. 2021 Sep;5(9):e620-e632. doi: 10.1016/S2542-5196(21)00195-9.                   | Europe   |
| Stroke incidence*             | PM2.5        | n=137148   |               |                      |            |                   | 1.1          | (1.01-1.21)         |                     |                            | 5 µg/m3               | Lancet Planet Health. 2021 Sep;5(9):e620-e632. doi: 10.1016/S2542-5196(21)00195-9.                   | Europe   |
| Stroke mortality              | O3           | 2          |               |                      |            |                   |              |                     | 1.01                | (0.97-1.05)                | 10 ppb                | BMJ Open. 2016 Feb 23;6(2):e009493. doi: 10.1136/bmjopen-2015-009493.                                | Global   |
| Stroke mortality              | O3           | 20         |               |                      |            |                   |              |                     | 1.35                | (-0.49-3.22)               | 10 ppb                | Int J Cardiol. 2014 Aug 1;175(2):307-13. doi: 10.1016/j.ijcard.2014.05.044. Epub 2014 May 17.        | Global   |
| Stroke mortality              | PM10         | 9          |               |                      |            |                   |              |                     | 1.01                | (0.83-1.21)                | 10 µg/m3              | Environ Int. 2020 Oct;143:105974. doi: 10.1016/j.envint.2020.105974. Epub 2020 Jul 20.               | Global   |
| Stroke mortality              | PM10 or conv | 12         | 1.08          | (0.992-1.177)        |            |                   |              |                     |                     |                            | 10 µg/m3              | Stroke. 2015 Nov;46(11):3058-66. doi: 10.1161/STROKEAHA.115.009913. Epub 2015 Oct 13.                | Global   |
| Stroke mortality              | PM2.5        | 8          |               |                      |            |                   |              |                     | 1.34                | (0.27-2.42)                | 10 µg/m3              | Int J Cardiol. 2014 Aug 1;175(2):307-13. doi: 10.1016/j.ijcard.2014.05.044. Epub 2014 May 17.        | Global   |
| Stroke mortality*             | CO           | 16         |               |                      |            |                   |              |                     | 7.78                | (4.49-11.60)               | 1 ppm                 | Int J Cardiol. 2014 Aug 1;175(2):307-13. doi: 10.1016/j.ijcard.2014.05.044. Epub 2014 May 17.        | Global   |
| Stroke mortality*             | NO2          | 24         |               |                      |            |                   |              |                     | 1.5                 | (0.37-2.63)                | 10 ppb                | Int J Cardiol. 2014 Aug 1;175(2):307-13. doi: 10.1016/j.ijcard.2014.05.044. Epub 2014 May 17.        | Global   |
| Stroke mortality*             | PM10         | 21         |               |                      |            |                   |              |                     | 0.65                | (0.54-0.77)                | 10 µg/m3              | Int J Cardiol. 2014 Aug 1;175(2):307-13. doi: 10.1016/j.ijcard.2014.05.044. Epub 2014 May 17.        | Global   |
| Stroke mortality*             | PM2.5        | 16         | 1.11          | (1.04-1.18)          |            |                   |              |                     |                     |                            | 10 µg/m3              | Environ Int. 2020 Oct;143:105974. doi: 10.1016/j.envint.2020.105974. Epub 2020 Jul 20.               | Global   |
| Stroke mortality*             | SO2          | 22         |               |                      |            |                   |              |                     | 2.45                | (1.83-3.07)                | 10 ppb                | Int J Cardiol. 2014 Aug 1;175(2):307-13. doi: 10.1016/j.ijcard.2014.05.044. Epub 2014 May 17.        | Global   |
| Systolic blood pressure       | PM10         | 1          |               |                      |            |                   |              |                     | 1.58                | (1.29-1.95)                | 10 µg/m3              | Blood Press. 2016 Jun;25(3):169-76. doi: 10.3109/08037051.2015.1111019. Epub 2015 Dec 4.             | Global   |
| Systolic blood pressure       | PM2.5        | 3          |               |                      |            |                   |              |                     | 4.18                | (1.66-10.48)               | 10 µg/m3              | Blood Press. 2016 Jun;25(3):169-76. doi: 10.3109/08037051.2015.1111019. Epub 2015 Dec 4.             | Global   |
